# Supplementary material for: Identification and Functional Analysis of MicroRNAs in Mice following Focal Cerebral Ischemia Injury
Source: Int J Mol Sci. 2015 Oct 14;16(10):24302–18. doi: 10.3390/ijms161024302 (PMC4632751; doi:10.3390/ijms161024302)
Supplement: Supplementary file 1 [file ijms-16-24302-s001.xls]

## Sheet: Table S1
Table S1. The expression level of 118 microRNAs in Sham and Ischemia groups
	Sham		Ischemia
ILMN_GENE	AVG_Signal	ARRAY_STDEV	AVG_Signal	ARRAY_STDEV	Diff Pval
mmu-let-7b*	1513.77	164.841	1190.58	79.6018	0.038615
mmu-let-7c-2*,mmu-let-7a*	4705.93	478.546	3647.15	416.635	0.00192865
mmu-let-7d*	12693	1182.06	10959.7	1101.6	0.0442249
mmu-let-7e	24029.8	1279.48	18616.9	4498.63	0.02397
mmu-let-7f*	447.458	69.3446	185.083	112.343	0.0290437
mmu-miR-101b	1888.55	83.1968	3662.96	1735.28	0.0432231
mmu-miR-101b:9.1	2387.68	178.678	4239.93	1687.8	0.0305145
mmu-miR-106b	2008.15	338.09	4082.86	1488.81	0.00701679
mmu-miR-106b*	830.927	61.0784	1247.15	201.635	0.00573524
mmu-miR-125b-3p	657.271	149.088	256.177	215.54	0.0140147
mmu-miR-126-5p	23993.3	1083.86	19858.8	2435.73	0.00500866
mmu-miR-127*	2450.33	344.401	3307.68	591.751	0.0160032
mmu-miR-133a	568.989	57.0852	1079.61	431.869	0.0344146
mmu-miR-133b	909.083	88.6423	1226.46	134.131	0.0297616
mmu-miR-135a*	685.739	328.121	197.083	173.623	0.0197339
mmu-miR-136*	10108.1	888.225	14368.1	1877.25	4.41712e-05
mmu-miR-138	17965.4	612.213	15107.7	1823.49	0.0099537
mmu-miR-138*	6216.8	393.132	4827.05	1069.94	0.0188777
mmu-miR-143	11560.6	1358.55	14069.8	1542.8	0.0163045
mmu-miR-145	13544	710.736	15506.2	1164.19	0.0480965
mmu-miR-148a	6540.08	387.242	9684.65	2393.44	0.0102787
mmu-miR-150	20965.4	440.105	18352.8	2066.01	0.0388223
mmu-miR-153	17692.4	1673.48	21462.7	3174.33	0.0358789
mmu-miR-154*	1101.99	94.1847	3170.43	1860.26	0.0273473
mmu-miR-155	606.021	251.19	209.052	116.115	0.018961
mmu-miR-16	17828.3	752.198	22235.8	3317.93	0.0129369
mmu-miR-181c	8731.86	2483.32	3721.71	1765.73	0.0010316
mmu-miR-181d	8700.93	704.949	2015.77	2593.42	6.9896e-07
mmu-miR-187	7279.36	1088.74	10907.3	773.882	1.18141e-05
mmu-miR-193b	6536.02	1050.56	9071.71	1332.46	0.00298496
mmu-miR-203	1587.71	186.955	2255.11	440.891	0.00982328
mmu-miR-204	15052	2639.82	8832.99	3627.09	0.005606
mmu-miR-22	17205.4	1086.79	20258	2317.91	0.019592
mmu-miR-223	4047.52	415.81	5777.36	1420.29	0.0204604
mmu-miR-23a	15367.2	1020.91	11535.6	1728.37	0.000177977
mmu-miR-24-2*	758.146	62.5407	1558.02	785.351	0.0499431
mmu-miR-26b	21213.8	610.599	17925.5	1510.73	0.00798419
mmu-miR-28	3375.15	355.219	4774.77	610.366	0.000132865
mmu-miR-297c*,mmu-miR-297a*,mmu-miR-297b-3p	2466.21	344.821	1422.49	616.176	0.00437335
mmu-miR-29b*	3685.96	855.547	1609.99	859.586	0.000724498
mmu-miR-30a	11766.9	1409.49	15120	2702.43	0.0281051
mmu-miR-30a*	9390.77	217.711	6606.99	1825.76	0.00444864
mmu-miR-30c-2*	3445.11	264.203	2597.77	169.964	0.000401789
mmu-miR-31	5385.08	883.882	6739.18	612.406	0.0235148
mmu-miR-323-3p	7216.46	472.548	8720.86	1278	0.0314614
mmu-miR-324-5p	7031.36	212.971	8290.43	1134.74	0.04635
mmu-miR-328	23541.7	804.288	20243.2	2085.21	0.0173241
mmu-miR-33*	385.208	75.7592	1218.11	740.351	0.030469
mmu-miR-330	7298.05	656.915	9626.65	2149.72	0.0390074
mmu-miR-337-3p	2070.74	260.897	3836.55	1286.34	0.00777794
mmu-miR-344	2676.8	745.878	6197.93	2648.61	0.0106826
mmu-miR-345-5p	1504.9	173.514	2855.43	769.5	0.000886275
mmu-miR-346	7508.27	893.663	5826.86	1278.15	0.032386
mmu-miR-34b-3p	3484.4	804.686	1418.33	319.69	3.22839e-06
mmu-miR-34c*	1481.71	286.308	486.896	122.174	6.01757e-08
mmu-miR-369-3p	11907.9	579.205	7754.77	3154.2	0.0111111
mmu-miR-369-5p	9009.49	934.091	10867.7	1218.62	0.0168799
mmu-miR-374	9376.65	535.178	6747.61	1613.74	0.00282607
mmu-miR-375	2339.61	190.679	1487.21	454.804	0.00152131
mmu-miR-376a	2895.4	203.785	3897.27	794.04	0.0189871
mmu-miR-376c	6451.49	649.587	8280.96	1571.34	0.0325212
mmu-miR-376c*	5756.96	1176.45	2070.18	2044.17	0.00183499
mmu-miR-377	1258.93	521.098	2907.4	987.973	0.00363988
mmu-miR-379	15579.6	365.349	12892.6	1103.85	0.00317783
mmu-miR-384-5p	7230.08	990.688	10084.8	1410.02	0.000994172
mmu-miR-410	9256.58	507.921	11234.6	1890.65	0.0496166
mmu-miR-421	4614.33	506.959	3549.99	847.28	0.0344144
mmu-miR-423-5p	1050.71	156.644	726.177	179.658	0.0349642
mmu-miR-433*	1615.99	91.5834	2826.21	588.642	0.000159338
mmu-miR-434-5p	10379.6	1190.25	13332.2	1765.92	0.00575503
mmu-miR-451	13121.8	1352.61	17820.7	1985.4	9.66132e-05
mmu-miR-466f-3p	3807.83	942.437	2135.02	977.752	0.014741
mmu-miR-467e	1552.4	310.229	2154.9	170.832	0.00941156
mmu-miR-487b	10132.7	375.896	11815.3	1093.41	0.0277716
mmu-miR-488	1599.15	81.7775	825.083	514.46	0.00692583
mmu-miR-496	2829.15	585.774	1232.08	1214.73	0.0190689
mmu-miR-509-5p	1179.52	231.591	1694.21	376.949	0.033206
mmu-miR-532-3p	6560.15	405.035	5408.21	896.709	0.0268066
mmu-miR-539	8506.15	658.73	7425.02	743.685	0.0487651
mmu-miR-541	11971.6	332.322	10344.9	1252.77	0.0329977
mmu-miR-582-3p	678.958	98.7907	1051.21	299.266	0.0447272
mmu-miR-582-5p	3419.99	745.064	4986.74	1256.03	0.0334336
mmu-miR-598	10042.3	883.878	7540.8	1760.82	0.0115049
mmu-miR-615-3p	5435.8	850.368	4423.9	203.744	0.0474757
mmu-miR-666-3p	691.958	168.976	1233.18	465.906	0.042073
mmu-miR-667	12336.8	950.252	10411.7	939.451	0.011675
mmu-miR-679	4521.77	377.616	3743.33	355.595	0.0125867
mmu-miR-683	1268.36	591.604	295.427	384.997	0.00787195
mmu-miR-689	205.708	125.794	2486.49	2026.36	0.0253176
mmu-miR-690	8818.9	1191.61	16630.2	933.808	1.61427e-12
mmu-miR-702	3703.33	718.193	2512.24	886.105	0.0395191
mmu-miR-708*	1113.43	117.908	1907.4	664.612	0.0241999
mmu-miR-709	7223.02	1499.39	13748	3315.15	0.000341658
mmu-miR-714	20.2706	34.6594	357.021	150.231	0.00762705
mmu-miR-744	6549.43	1144.74	4659.71	1136.76	0.0200272
mmu-miR-770-5p	4163.86	599.307	5186.58	753.406	0.0372955
mmu-miR-7b	14408.5	1904.44	11812.9	1467.83	0.0313978
mmu-miR-801:9.1	285.708	40.75	1222.05	250.272	8.98263e-09
mmu-miR-805	14808.2	1545.21	7074.86	4146.53	0.000479773
mmu-miR-872	2411.3	416.69	469.864	546.688	5.49621e-08
mmu-miR-877*	5536.99	892.828	2369.33	1734.72	0.00123303
mmu-miR-92a	11334.7	1435.1	8224.4	1923.56	0.00978039
mmu-miR-92b	14592.6	500.313	12602.5	1114.79	0.0235684
mmu-miR-98	15820	1329	13041.6	2027.28	0.0223164
solexa-110-3896	11665.3	530.023	9341.43	753.116	0.000644475
solexa-1127-427	10124.3	517.85	13113.1	1622.69	0.000831755
solexa-130-3526	774.271	260.472	58.1456	219.154	0.000260137
solexa-1328-360	13435	951.031	9898.43	1719.6	0.000341192
solexa-1837-257	4348.3	303.881	5891.52	1199.33	0.0145153
solexa-231-1844	3766.3	1382.67	676.239	1307.44	0.00123454
solexa-27-9416	19924.8	980.155	27090.9	552.405	1.34905e-05
solexa-284-1594	1928.21	585.844	790.802	634.601	0.0101882
solexa-3062-153	2924.43	366.718	4933.55	1129.48	0.000840514
solexa-308-1456	3825.43	818.834	8818.99	1652.54	7.25111e-08
solexa-3253-144	6421.08	1273.19	13648.1	1052.59	4.91828e-13
solexa-4327-106	1219.74	795.647	3826.08	1994.93	0.0156433
solexa-5560-82	12440.7	813.022	18256.4	2269.16	1.9041e-06
solexa-897-515	3803.8	272.545	4612.93	500.987	0.0142864
